# Supplementary material for: Statin Action Targets Lipid Rafts of Cell Membranes: GIXD/PM-IRRAS Investigation of Langmuir Monolayers
Source: PubMed Central journal article supplement (PMC10440791; doi:10.1021/acs.jpcb.3c02574), 2023-08-08
Supplement: jp3c02574_si_001.pdf [file jp3c02574_si_001.pdf]

## Supporting Information

### Statin Action Targets Lipid Rafts of Cell Membranes: GIXD / PM-IRRAS Investigation of Langmuir Monolayers.

Michalina Zaborowska<sup>1</sup>, Marcin Broniatowski<sup>2</sup>, Philippe Fontaine<sup>3</sup>, Renata Bilewicz<sup>1</sup> and Dorota Matyszewska<sup>4\*</sup>

<sup>1</sup>*Faculty of Chemistry, University of Warsaw, Pasteura 1, 02093 Warsaw, Poland*

<sup>2</sup>*Faculty of Chemistry, Jagiellonian University, Gronostajowa 2, 30387 Kraków, Poland*

<sup>3</sup>*Synchrotron SOLEIL, L'Orme des Merisiers, Départementale 128, 91190, Saint-Aubin, France*

<sup>4</sup>*Faculty of Chemistry, Biological and Chemical Research Centre, University of Warsaw, Żwirki i Wigury 101, 02089 Warsaw, Poland*

Table S1 Characteristic parameters of Langmuir monolayers formed on PBS buffer and PBS subphase containing  $10^{-5}$  M of statins.

|                              | Subphase        | $A_0$ (Å <sup>2</sup> ) | $A_{\pi=30 \text{ mN/m}}$ (Å <sup>2</sup> ) | $C_s^{-1}\text{max}$ (mN/m) |
|------------------------------|-----------------|-------------------------|---------------------------------------------|-----------------------------|
| <i>Chol</i>                  | PBS pH=7.4      | 41.6±0.4                | 37.5±0.2                                    | 399±10                      |
|                              | $10^{-5}$ M FLU | 43.8±0.7                | 39.4±0.3                                    | 310±8                       |
|                              | $10^{-5}$ M CER | 72.7±1.8                | 48.0±2.0                                    | 67±12                       |
| <i>SM</i>                    | PBS pH=7.4      | 50.7±1.0                | 44.3±1.0                                    | 185±6                       |
|                              | $10^{-5}$ M FLU | 64.8±0.7                | 55.6±1.1                                    | 131±0                       |
|                              | $10^{-5}$ M CER | 59.7±2.0                | 45.1±0.2                                    | 87±4                        |
| <i>Chol:SM</i><br><i>1:1</i> | PBS pH=7.4      | 42.5±0.5                | 38.0±0.3                                    | 360±11                      |
|                              | $10^{-5}$ M FLU | 44.6±0.5                | 41.3±0.3                                    | 360±3                       |
|                              | $10^{-5}$ M CER | 50.0±0.0                | 40.2±1.0                                    | 220±10                      |

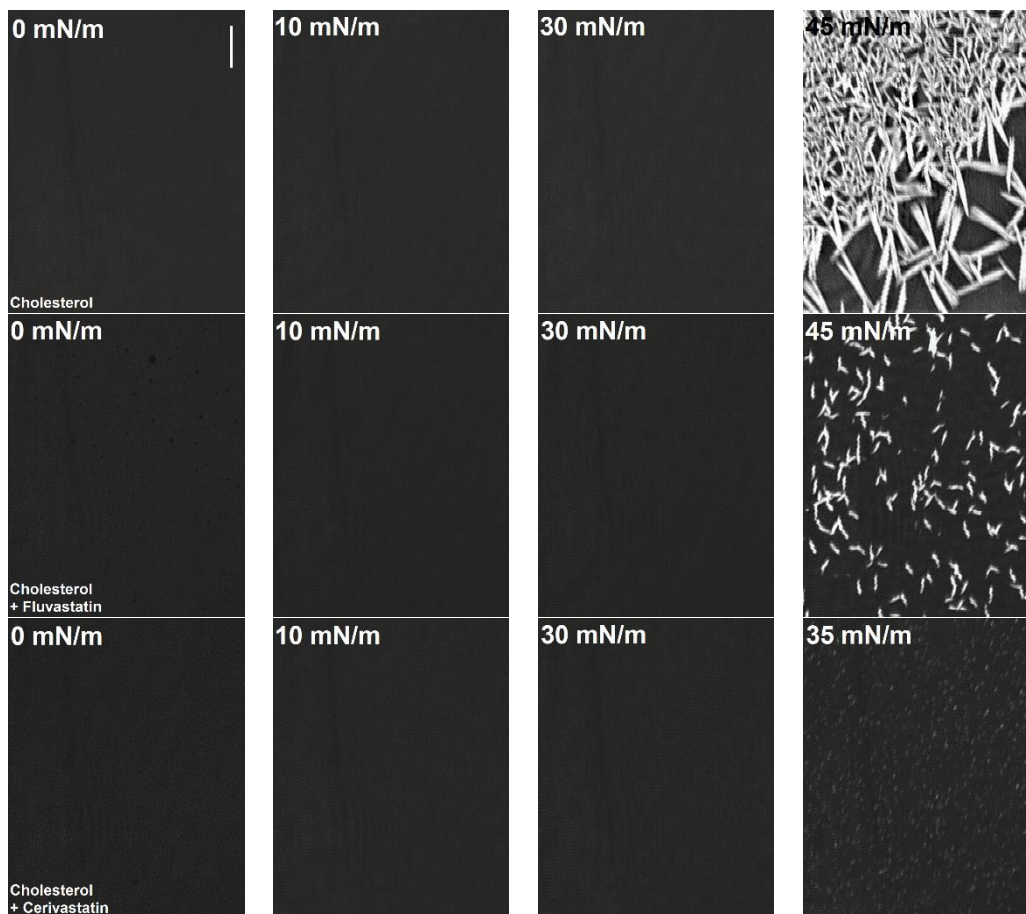

Figure S1. BAM pictures obtained at selected surface pressures for Chol monolayers formed on PBS buffer pH 7.4 and PBS pH 7.4 containing  $10^{-5}$  M statins. ( $T=21\pm 1^\circ\text{C}$ ). The scale bar is  $100\ \mu\text{m}$ .

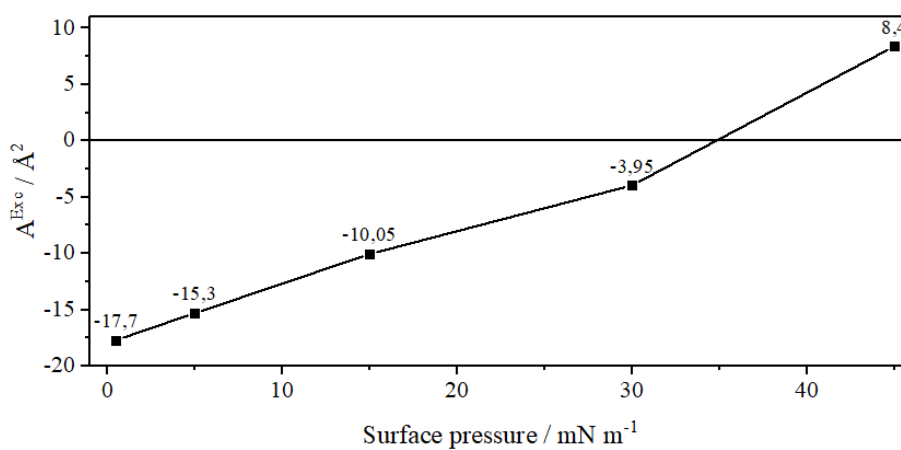

Figure S2. Values of the excess area ( $A^{Exc}$ ) calculated at selected surface pressures for Chol:SM 1:1 monolayers.

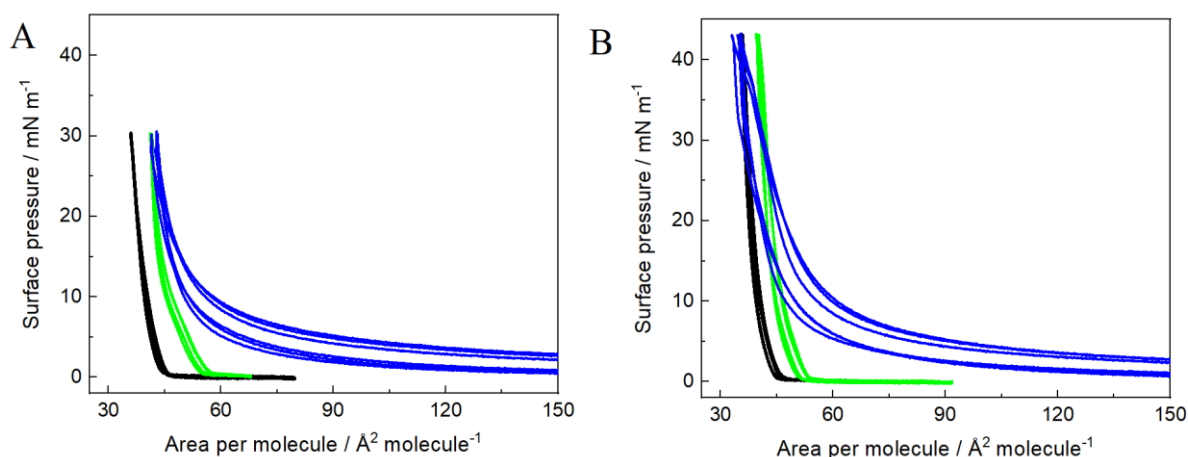

Figure S3 Compression-expansion cycles for Chol:SM 1:1 monolayers on pure PBS buffer (black) and buffer containing  $10^{-5}$  M FLU (green) and CER (blue) compressed to A) 30 mN/m and B) 43 mN/m.

Table S2 Thermodynamic functions of hysteresis: the free energy of compression ( $\Delta G_{comp}$ ), expansion ( $\Delta G_{exp}$ ) and hysteresis ( $\Delta G^{hys}$ ), the configurational entropy of hysteresis ( $T\Delta S^{hys}$ ), and the enthalpy of hysteresis ( $\Delta H^{hys}$ ) for Chol:SM 1:1 monolayers formed on pure PBS subphase and PBS subphase containing statins compressed to 43 mN/m.

| Subphase        | $\Delta G_{comp}/$<br>kcal·mol <sup>-1</sup> | $\Delta G_{exp}/$<br>kcal·mol <sup>-1</sup> | $\Delta G^{hys}/$<br>kcal·mol <sup>-1</sup> | $T\Delta S^{hys}/$<br>kcal·mol <sup>-1</sup> | $\Delta H^{hys}/$<br>kcal·mol <sup>-1</sup> |
|-----------------|----------------------------------------------|---------------------------------------------|---------------------------------------------|----------------------------------------------|---------------------------------------------|
| <i>43 mN/m</i>  |                                              |                                             |                                             |                                              |                                             |
| PBS pH=7.4      | $0.17\pm 0.0$                                | $0.13\pm 0.0$                               | $-0.05\pm 0.0$                              | $-2.4\pm 0.2$                                | $-2.5\pm 0.5$                               |
| $10^{-5}$ M FLU | $0.26\pm 0.07$                               | $0.17\pm 0.0$                               | $-0.09\pm 0.01$                             | $-1.5\pm 0.2$                                | $-1.6\pm 0.2$                               |
| $10^{-5}$ M CER | $1.48\pm 0.2$                                | $0.79\pm 0.2$                               | $-0.7\pm 0.02$                              | $-6.8\pm 0.1$                                | $-7.5\pm 0.3$                               |

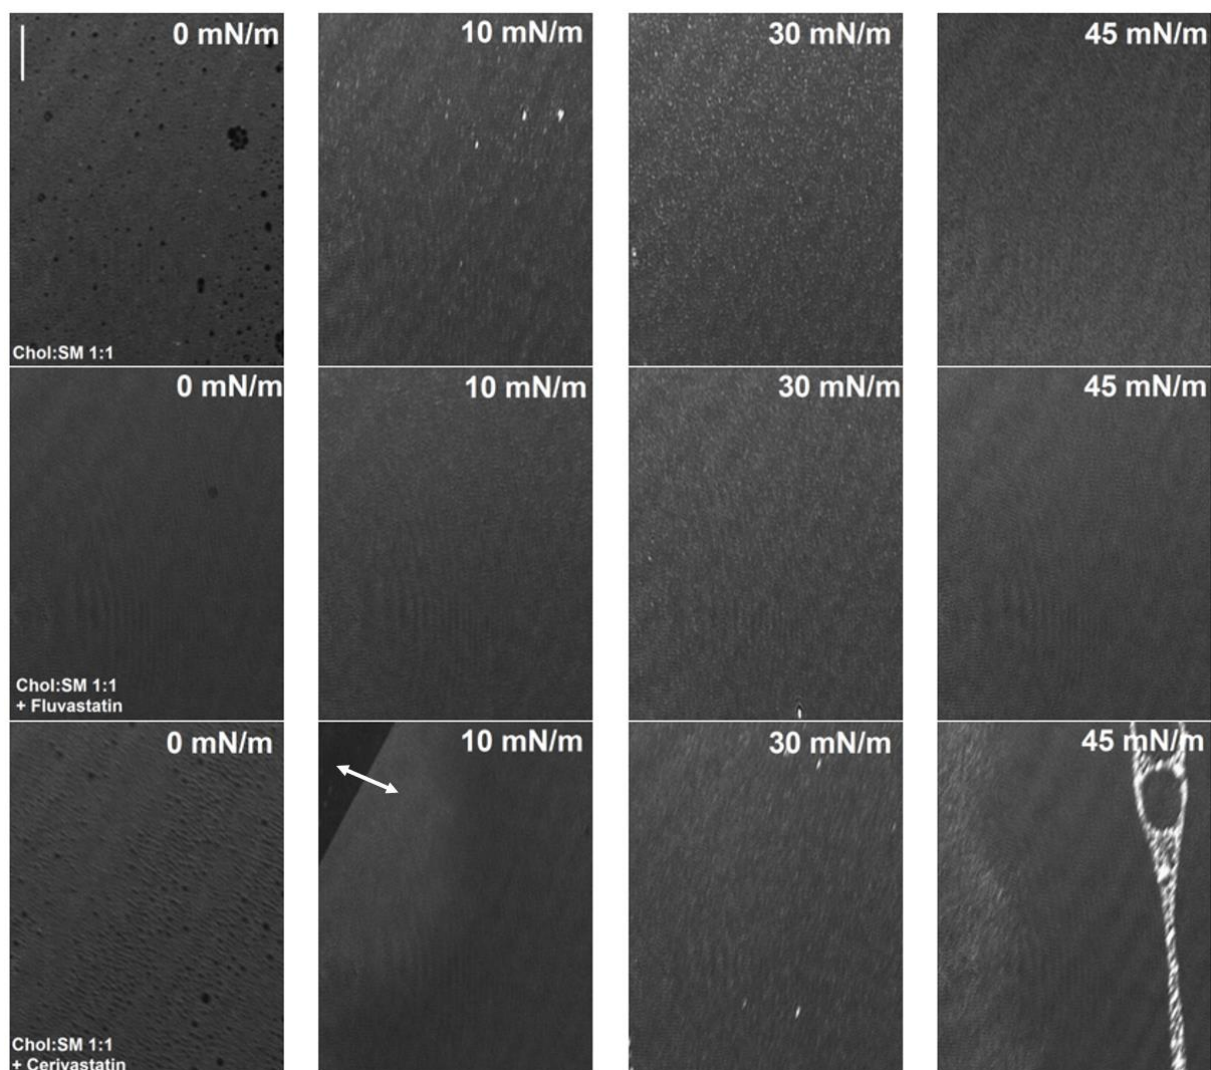

Figure S4. BAM pictures obtained at selected surface pressures for Chol:SM 1:1 monolayers formed on PBS buffer pH 7.4 and PBS pH 7.4 containing  $10^{-5}$  M statins ( $T=21\pm 1^\circ\text{C}$ ). The scale bar is 100  $\mu\text{m}$ .
